# Supplementary material
Source: PubMed Central journal article supplement (PMC7092827)
Supplement: mmc1.pdf [file mmc1.pdf]

Supplementary Table 1. Primers used in this study.

| Reporter plasmid           |     | Sequence                                            |
|----------------------------|-----|-----------------------------------------------------|
| pLacZ-SARS-PS318           | (F) | 5'-GAAAGCTTTGAGCTTTGGGCTAAGCGTA-3'                  |
|                            | (R) | 5'-TTCCTAGGCTAGCTTGTGCTGGTCCC-3'                    |
| pLacZ-SARS-PS230           | (F) | 5'-GAAAGCTTTGAGCTTTGGGCTAAGCGTA-3'                  |
|                            | (R) | 5'-TTCCTAGGTACCTGTCCTTCCACTCTACC-3'                 |
| pLacZ-SARS-PS151           | (F) | 5'-GAAAGCTTCCTACTGAGAGTGCTTGTTTC-3'                 |
|                            | (R) | 5'-TTCCTAGGCTAGCTTGTGCTGGTCCC-3'                    |
| Protein expression plasmid |     | Sequence                                            |
| pTAC-SARS-N                | (F) | 5'-GGGTCTAGAAGGAGGTTTAAAATAATGAGTGACAATGGACCACAG-3' |
|                            | (R) | 5'-GGGAAGCTTTGATGATGATCATTAAAGCCTGGGTGCTGTCAGC-3'   |
| pTAC-N1(45-181)            | (F) | 5'-GGGTCTAGAAGGAGGTTTAAAATAATGGGACTGCCAAACAACACA-3' |
|                            | (R) | 5'-GGGAAGCTTTTCATCAGCTGCCTCCCCTGCTGCCCTCAGC-3'      |
| pTAC-N2(1-181)             | (F) | 5'-GGGTCTAGAAGGAGGTTTAAAATAATGAGTGACAATGGACCACAG-3' |
|                            | (R) | 5'-GGGAAGCTTTTCATCAGCTGCCTCCCCTGCTGCCCTCAGC-3'      |
| pTAC-N3(1-365)             | (F) | 5'-GGGTCTAGAAGGAGGTTTAAAATAATGAGTGACAATGGACCACAG-3' |
|                            | (R) | 5'-GGGAAGCTTTTCATCAAGGAAAGGTCTTGTAGGCATCAAT-3'      |
| pTAC-N4(45-365)            | (F) | 5'-GGGTCTAGAAGGAGGTTTAAAATAATGGGACTGCCAAACAACACA-3' |
|                            | (R) | 5'-GGGAAGCTTTTCATCAAGGAAAGGTCTTGTAGGCATCAAT-3'      |
| pTAC-N5(182-365)           | (F) | 5'-GGGTCTAGAAGGAGGTTTAAAATAATGCAGGCATCCAGCAGGTCC-3' |
|                            | (R) | 5'-GGGAAGCTTTTCATCAAGGAAAGGTCTTGTAGGCATCAAT-3'      |
| pTAC-N6(182-422)           | (F) | 5'-GGGTCTAGAAGGAGGTTTAAAATAATGCAGGCATCCAGCAGGTCC-3' |
|                            | (R) | 5'-GGGAAGCTTTGATGATGATCATTAAAGCCTGGGTGCTGTCAGC-3'   |
| pTAC-N7(248-365)           | (F) | 5'-GGGTCTAGAAGGAGGTTTAAAATAATGACCAAGAAGTCTGCTGCT-3' |
|                            | (R) | 5'-GGGAAGCTTTTCATCAAGGAAAGGTCTTGTAGGCATCAAT-3'      |

Restriction enzyme sites used are underlined.
