# Supplementary material
Source: PubMed Central journal article supplement (PMC7092827)
Supplement: mmc2.pdf [file mmc2.pdf]

## Supplementary Materials and Methods

### Blue/White colony screening

X-gal/IPTG LB agar plates were produced by spreading 40  $\mu$ L of the 20 mg/mL X-Gal Solution (Chembio Co., Seoul, South of Korea) and 40  $\mu$ L of 100 mM IPTG Solution (Chembio Co., Seoul, South of Korea) on LB agar plates containing antibiotics. Transformed JM109 cells were inoculated onto these plates and incubated at 37°C for 16 hours. Images of colonies formed on each plate were captured using digital camera (EOS 100D, Canon Inc., Tokyo, Japan).

### Western blot analysis

An approximately equal number of cells (OD<sub>600</sub> of 0.4) was harvested after 4 hours of IPTG induction, followed by centrifugation at 13,000rpm for 1 min. The pellet was resuspended with 80  $\mu$ L of sterile water and 20  $\mu$ L of sample buffer (60 mM Tris-HCl, 2% SDS, 25% glycerol, 0.1% bromophenol blue, 50  $\mu$ L  $\beta$ -mercaptoethanol). The sample was boiled for 10 min and centrifuged for 10 min at 4°C. Supernatants from each sample were resolved by SDS-polyacrylamide gel electrophoresis (SDS-PAGE) on 10%, 12% and 15% acrylamide gels and were electrophoretically blotted on to a nitrocellulose filter membrane prior to probing with appropriate antibodies. Antibodies used were two Rabbit anti-SARS-N polyclonal antibodies (Novus Biologicals, CO, USA) (Sino Biological Inc., Beijing, China), mouse anti- $\beta$ -galactosidase polyclonal antibody (Promega Co., WI, USA), and mouse anti-alkaline phosphatase (ALP) monoclonal antibody (Chemicon international Inc., MA, USA). Either rabbit or anti-mouse IgG conjugate (Thermo Fisher Scientific, CA, USA) were used as secondary antibodies.

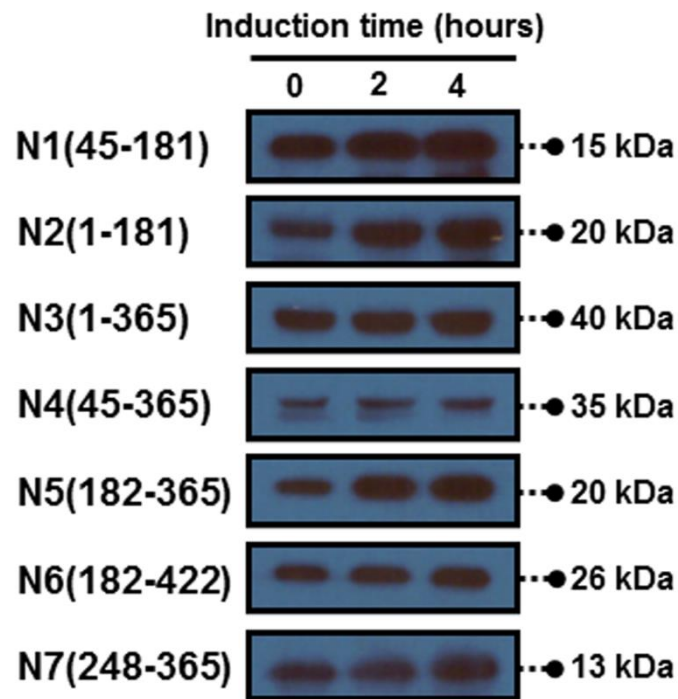

**Supplementary Figure 1.** Western blot results of various deletion constructs of SARS-CoV N-protein are as described in **Fig. 3A**. N1(44-181), N2(1-181), N3(1-365), N4(45-365), N5(182-365), N6(182-422) and N7(248-365) protein bands were detected with lysates obtained from transformed JM109s induced with 0.5 mM IPTG. The molecular weights of the truncated N-protein produced by each deletion construct are indicated on the right.
