# Supplementary material
Source: PubMed Central journal article supplement (PMC7092827)
Supplement: mmc3.pdf [file mmc3.pdf]

**Supplementary Table 2. Packaging sequence of coronaviruses used in this study.**

|                      | Packaging sequence (5' - 3')                                                                                                                                                                                                                                                                                                                                 | Length | GenBank  |
|----------------------|--------------------------------------------------------------------------------------------------------------------------------------------------------------------------------------------------------------------------------------------------------------------------------------------------------------------------------------------------------------|--------|----------|
| <b>HCoV-PS100</b>    | CTTCAGCCAATTCGACAGCCTGGGAGTCAGCTCTAACCAGA<br>GCCCACAAGGTAATCTGGGGAGTAATGGTAAACCCGGTAAT<br>GTCGGTGGTAATGATGCT                                                                                                                                                                                                                                                 | 100    | AY391777 |
| <b>MHV-PS97</b>      | CTTCAGCCGTACAGGGAGCCTTGAACCGAGCCATTACCGGA<br>GCCCACAAGGTAATCCGGGTGGTAATCGCGTGGGTGATCTC<br>AGCGGTAATGAAGCT                                                                                                                                                                                                                                                    | 97     | AY700211 |
| <b>Flu-N(F)-PS57</b> | GCGACCAAAGGCACCAAACGATCTTACGAACAGATGGAGA<br>CTGATGGAGAACGCCAG                                                                                                                                                                                                                                                                                                | 57     | CY034135 |
| <b>SARS-PS318</b>    | TGAGCTTTGGGCTAAGCGTAACATTAACCAGTGCCAGAGA<br>TTAAGATACTCAATAATTTGGGTGTTGATATCGCTGCTAATAC<br>TGTACATCTGGGACTACAAAAGAGAAGCCCCAGCACATGTA<br>TCTACAATAGGTGTCTGCACAATGACTGACATTGCCAAGAA<br>ACCTACTGAGAGTGCTTGTTCCTTCACTTACTGTCTTGTGTTGA<br>TGGTAGAGTGGAAGGACAGGTAGACCTTTTTAGAAACGCC<br>CGTAATGGTGTTTTAATAACAGAAGGTTTCAGTCAAAGGTCT<br>AACACCTTCAAAGGGACCAGCACAAGCTA | 318    | AY291451 |
| <b>SARS-PS220</b>    | TGAGCTTTGGGCTAAGCGTAACATTAACCAGTGCCAGAGA<br>TTAAGATACTCAATAATTTGGGTGTTGATATCGCTGCTAATAC<br>TGTACATCTGGGACTACAAAAGAGAAGCCCCAGCACATGTA<br>TCTACAATAGGTGTCTGCACAATGACTGACATTGCCAAGAA<br>ACCTACTGAGAGTGCTTGTTCCTTCACTTACTGTCTTGTGTTGA<br>TGGTAGAGTGGAAGGACAGGTA                                                                                                  | 230    | AY291451 |
| <b>SARS-PS151</b>    | CCTACTGAGAGTGCTTGTTCCTTCACTTACTGTCTTGTGTTGAT<br>GGTAGAGTGGAAGGACAGGTAGACCTTTTTAGAAACGCC<br>GTAATGGTGTTTTAATAACAGAAGGTTTCAGTCAAAGGTCTA<br>ACACCTTCAAAGGGACCAGCACAAGCTA                                                                                                                                                                                        | 151    | AY291451 |
